# Supplementary material for: Molecular sonification for molecule to music information transfer
Source: Royal Society of Chemistry journal article supplement (doi:10.1039/d3dd00008g), 2023-01-01
Supplement: d3dd00008g1.pdf [file d3dd00008g1.pdf]

## Table of Contents for Supporting Information

**Article Title:** Molecular Sonification for Molecule to Music Information Transfer

### Contents:

**Supplementary Figure S1:** Key Occurrence in DrugBank

**Supplementary Figure S2:** SELFIES encoding/decoding algorithm

**Supplementary Figure S3:** Large molecules encoded by SELFIES

**Supplementary Figure S4:** Four-point interpolation of SELFIES encoded drugs

**Journal:** Submitted to Digital Discovery

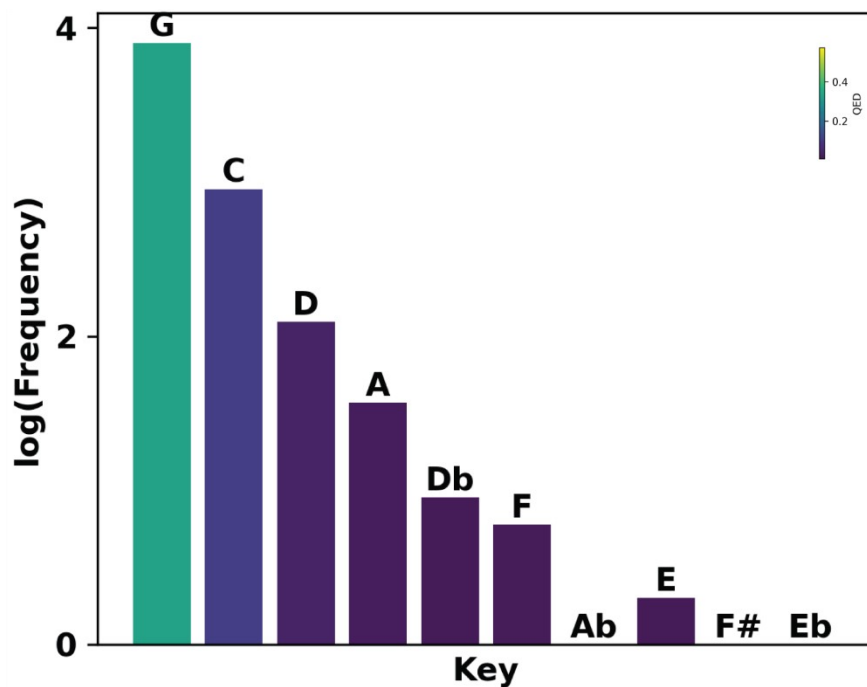

**Figure S1** – frequency of occurrence of the key of drugs converted to music in DrugBank, colored by average QED.

| SELFIES Token | MIDI Shift (Major Scale) | MIDI Value in key of G | MIDI Value in key of C |
|---------------|--------------------------|------------------------|------------------------|
| [C]           | +0                       | 55                     | 48                     |
| [=C]          | +2                       | 57                     | 50                     |
| [Branch1_1]   | +4                       | 59                     | 52                     |
| [Ring1]       | +5                       | 60                     | 53                     |
| [O]           | +7                       | 62                     | 55                     |
| [Branch1_2]   | +9                       | 64                     | 57                     |
| [N]           | +11                      | 66                     | 59                     |
| [=O]          | +12                      | 67                     | 60                     |

**Figure S2** – The MIDI shifts correspond to SELFIES tokens as ranked by their popularity in DrugBank. As such, lower MIDI shifts away from the encoded key of the molecule indicate the more popular the SELFIES token.

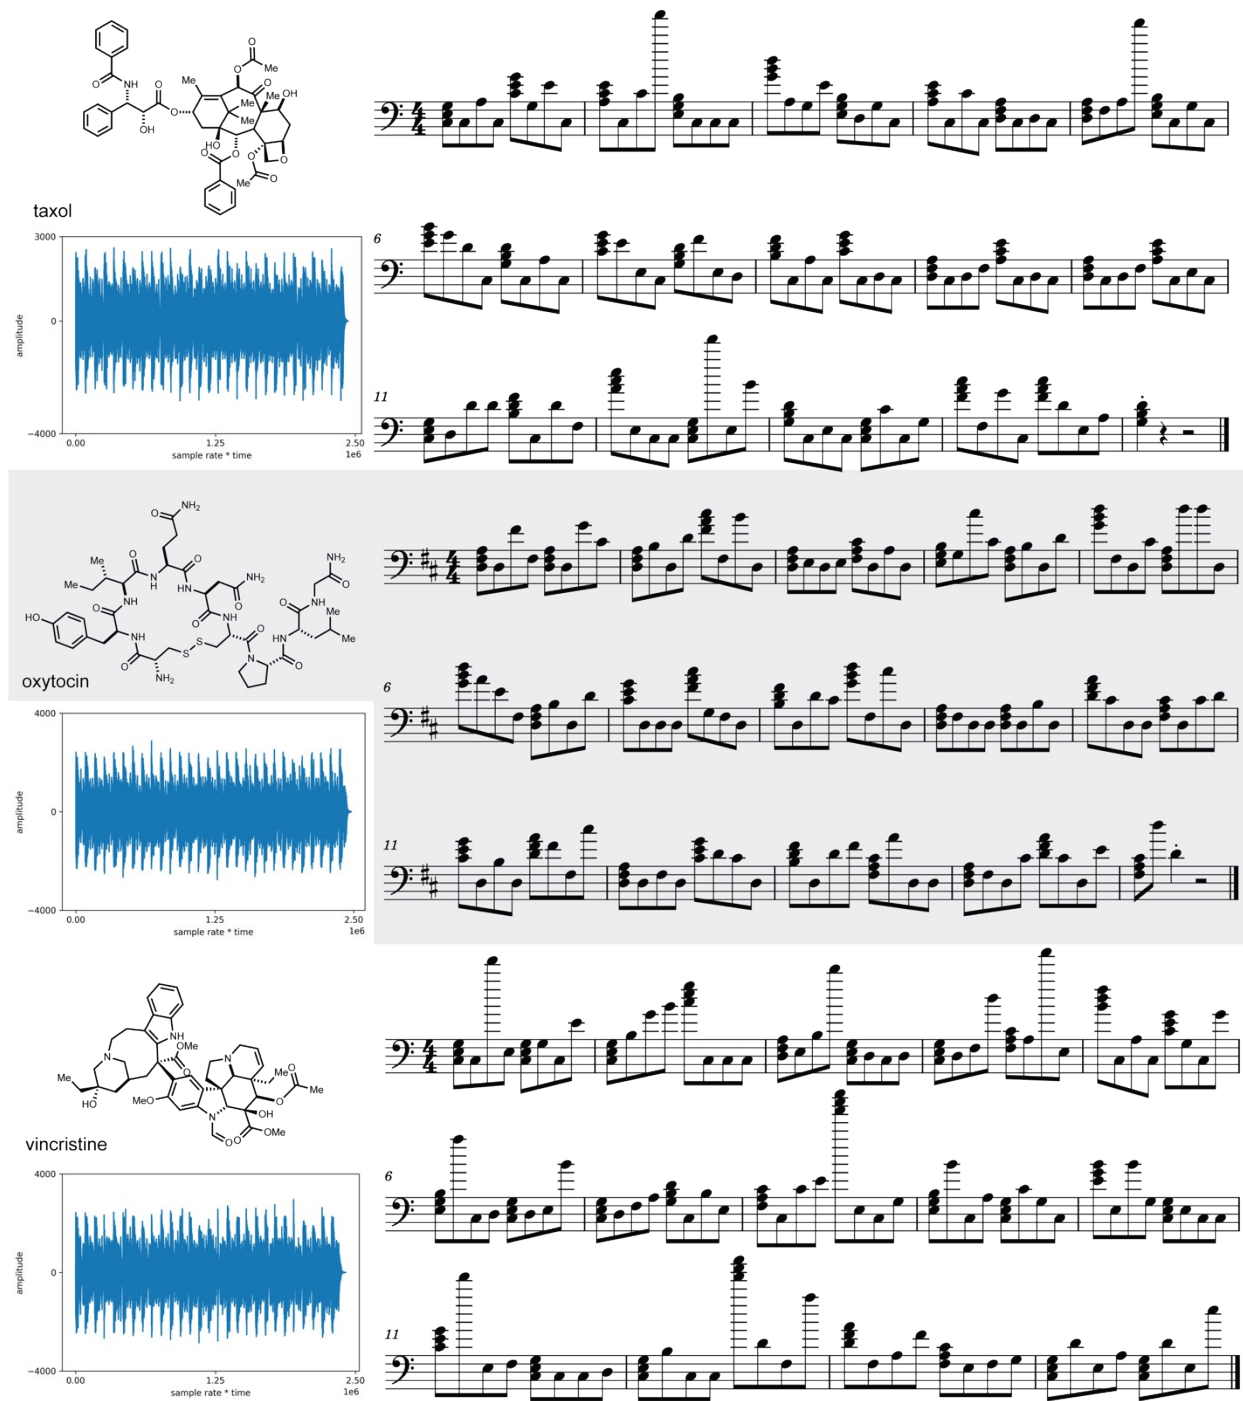

**Figure S3** – SAMPLES examples of large molecules taxol, oxytocin, and vincristine.

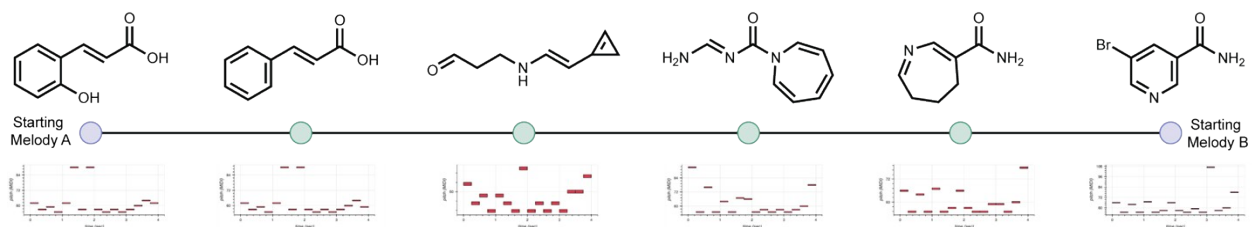

**Figure S4** – Four point CROSSFADE interpolation between two drug molecules.
